# Supplementary material for: Liquid metal sponges for mechanically durable, all-soft, electrical conductors
Source: Royal Society of Chemistry journal article supplement (doi:10.1039/c6tc05358k), 2016-12-22
Supplement: c6tc05358k1.pdf [file c6tc05358k1.pdf]

## Supporting Information

### **Liquid Metal Sponges for Mechanically-Durable, All-Soft, Electrical Conductors**

*Suqing Liang, Yaoyao Li, Yuzhen Chen, Jinbin Yang, Taipeng Zhu, Deyong Zhu, Chuanxin He, Yizhen Liu, Stephan Handschuh-Wang, and Xuechang Zhou \**

College of Chemistry and Environmental Engineering,  
Shenzhen University, Shenzhen, 518060, P. R. China  
Fax: (+) 86-755-26536141; Tel: (+) 86-755-26536627  
E-mail: xczhou@szu.edu.cn (X. C. Z.)

### **Experimental**

*Preparation of the PDMS and liquid metal-filled PDMS sponges:* PDMS sponges were prepared according to procedures describes previously.<sup>[1]</sup> Briefly, in a typical experiment, 50g PDMS prepolymer and 5g curing agent (Sylgard 184, Dow Corning) were mixed at a ratio of 10:1(weight ratio), and followed by immersing 6 sugar cubes (Tai Gang Food Co. Ltd, China). Afterward, the sugar cube-PDMS mixture was degassed in a vacuum chamber for 2 h. The sugar cube-PDMS mixture was solidified by curing at 65 °C at ambient pressure for 3 h. Afterward, PDMS on the surface was wiped off to expose the sugar. Subsequently, the sugar was dissolved under stirring in water at 60 °C, followed by rinsing with deionized (DI) water. Finally, PDMS sponges were obtained by drying at 100 °C at for 2 h. To fabricate liquid metal-filled PDMS sponges, the PDMS sponges were placed in a bath for 5 to 60 min containing the commercially available GaInSn liquid metals under vacuum.

*Assembly of the LED circuits with GaInSn PDMS sponges:* An array of GaInSn PDMS sponges was placed in a half-cured liquid elastomer (Ecoflex ® 00-30, Smooth-On), and then cured for 4 hours at room temperatures. Contacts of LED lamps were subsequently inserted into the GaInSn PDMS sponges, leading to the formation of flexible LED circuits with GaInSn PDMS sponges as interconnects.

*Characterization:* The morphology of the PDMS sponges and GaInSn Sponges was characterized with an optical microscope (SMZ18, Nikon), equipped with a CMOS camera.

The stretching and compression tests were conducted by using computer-controlled moving stages (PSA050, Zolix). The resistances of the GaInSn-PDMS sponges were measured by using a 4-point probe method with a Keithley 2400 sourcemeter. I-V characterization of the LED circuits was conducted by using a Keithley 2400 Multimeter GPIB remote control.

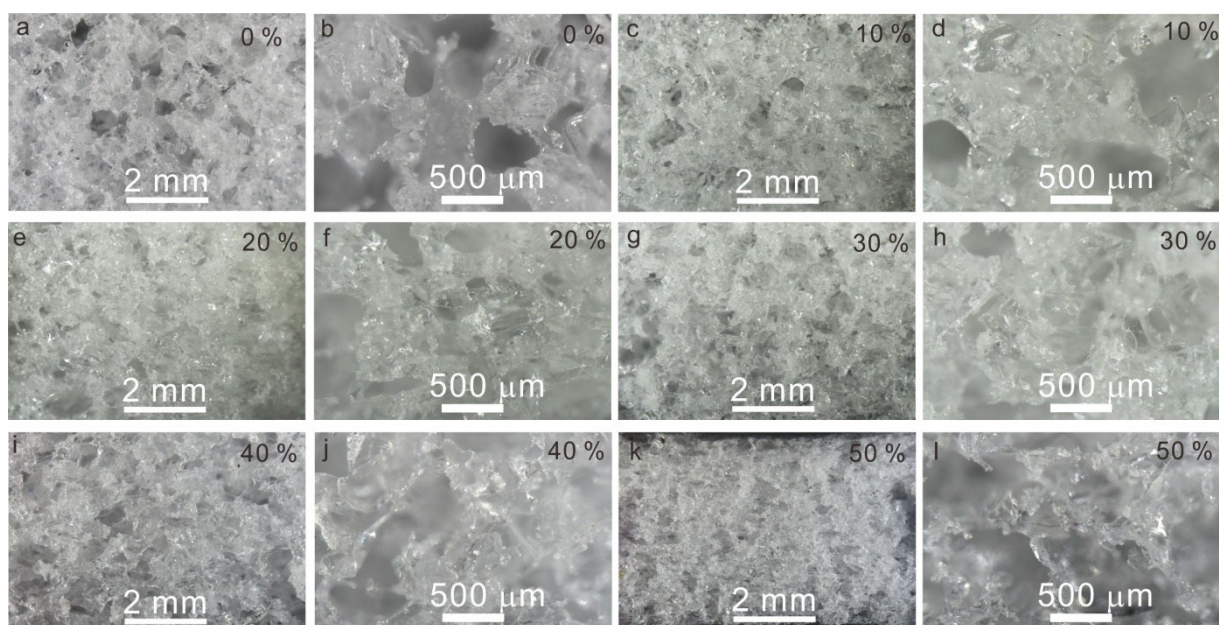

**Figure S1.** Optical micrographs of the PDMS sponges at different tensile strains: a-b) 0%, c-d) 10%, e-f) 20%, g-h) 30%, i-j) 40%, and k-l) 50%.

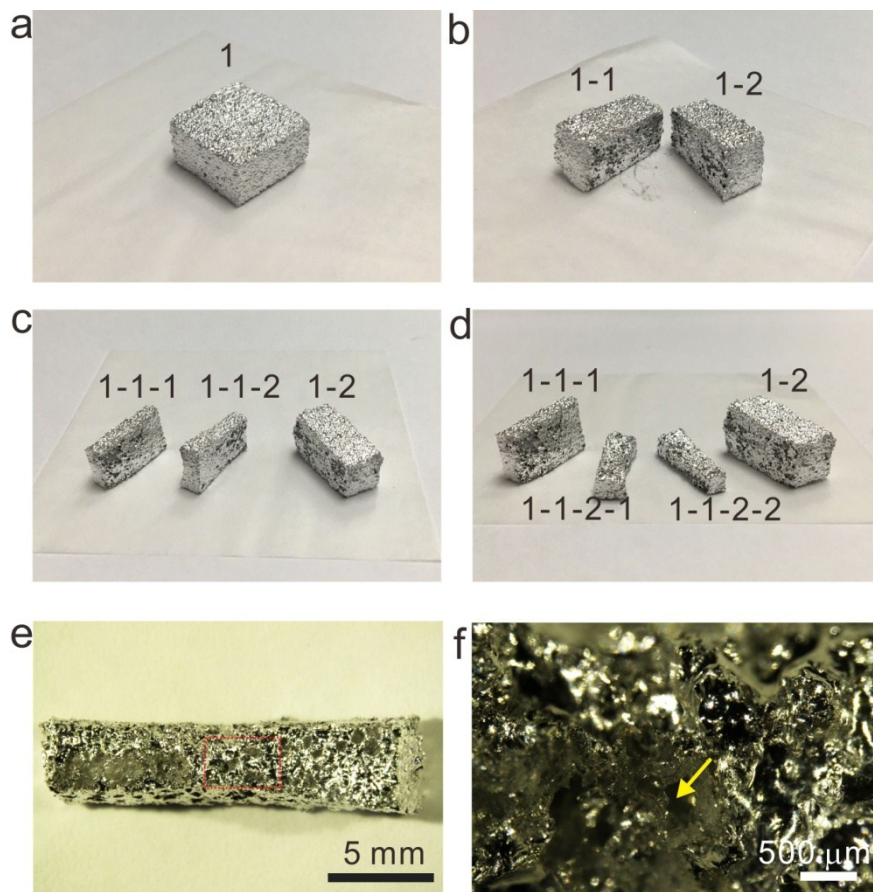

**Figure S2.** Digital images (a-d) and optical micrographs (e-f) of the liquid metal sponges with a density of  $2.4 \text{ g/cm}^3$ : (a) the original liquid metal sponges; (b) the sponges was cut into two pieces, 1-1 and 1-2; (c) the half-cut sponges (1-1) were then further cut into sponges 1-1-1 and 1-1-2; (d) the sponges (1-1-2) were cut into sponges 1-1-2-1 and 1-1-2-2. The digital images and optical micrographs shows that the liquid metal spreads well within the sponges, and however, for a relative low loading, some empty pores are observed (see the arrow position in f).

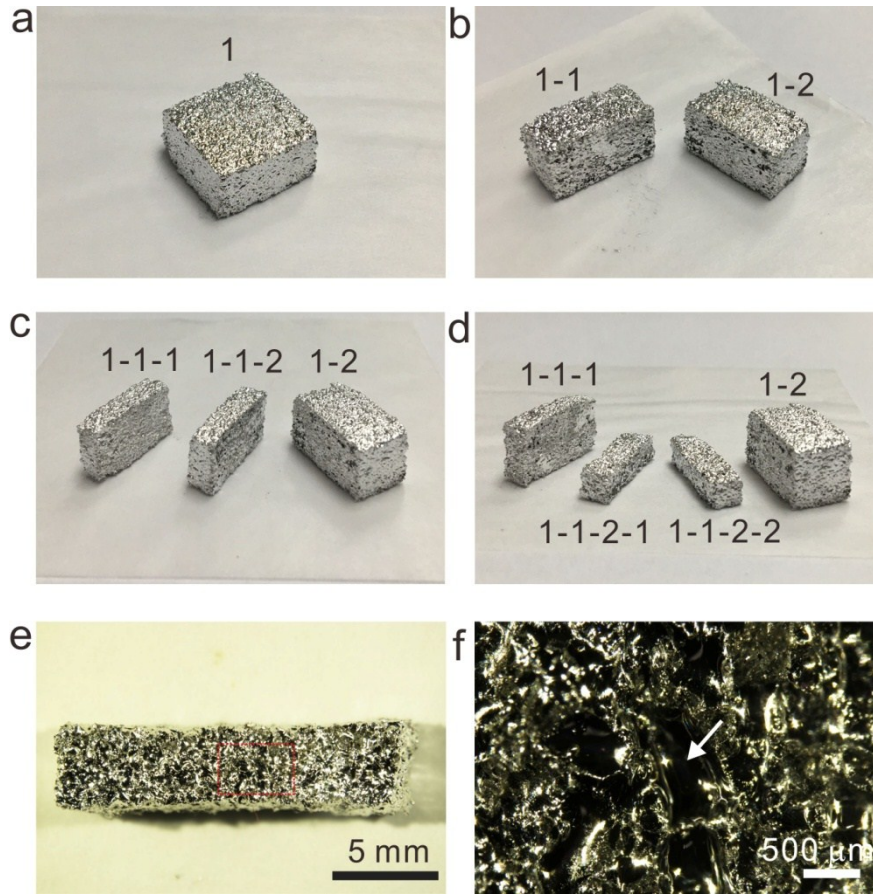

**Figure S3.** Digital images (a-d) and optical micrographs (e-f) of the liquid metal sponges with a density of  $3.5 \text{ g/cm}^3$ : (a) the original liquid metal sponges; (b) the sponges was cut into two pieces, 1-1 and 1-2; (c) the half-cut sponges (1-1) were then further cut into sponges 1-1-1 and 1-1-2; (d) the sponges (1-1-2) were cut into sponges 1-1-2-1 and 1-1-2-2. The digital images and optical micrographs shows that the liquid metal spreads well within the sponges, and however, for a relative large loading, no empty pores are observed (arrow position in f shows the liquid metal-filled pores).

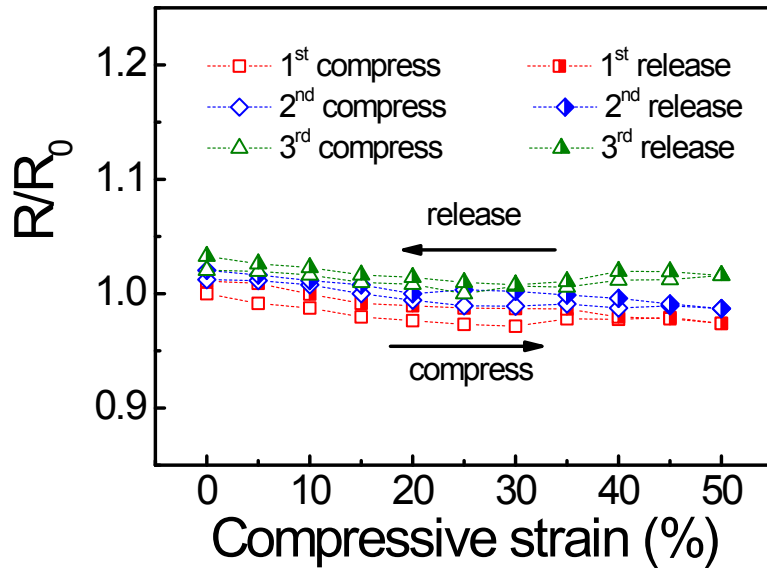

**Figure S4.** The normalized resistance variation of the rectangular-shape (Length = 12.5 mm, Width = 6.5 mm, Height = 11.5 mm) liquid metal sponges with an overall density of 1.77 g/cm<sup>3</sup> in the first three cycles of compression and release from 0 to 50%.

#### Reference

[1] S. Q. Liang, Y. Y. Li, J. B. Yang, J. M. Zhang, C. X. He, Y. Z. Liu, X. C. Zhou, Adv. Mater. Technol. 2016, 1, 1600117.
